# Supplementary material for: The Service Needs Index: A Tool to Quantify Complexity and Identify Treatment Needs in Youth Mental Health Services
Source: Research Square preprint supplement (doi:10.21203/rs.3.rs-6019878/v1), 2025-02-17
Supplement: Supplementary file 1 [file 70b29c3ba444a47f9795e036.docx]

**Appendix 1**

**Description of questionnaires in the Innowell Platform.**

Distress:

K-10 – The Kessler-10 (K-10) measures psychological distress over the past 4 weeks 1. It is a well-validated measure widely used in adult and adolescent populations in both clinical and community settings. The scale consists of 10 items with five multiple choice options ranging from “none of the time” (1) to “all of the time” (5). Total scores range from 10-50. A total score of under 20 indicates ‘likely no distress’, 20-24 indicates ‘likely mild mental disorder’, 25-29 indicates ‘likely moderate mental disorder’, over 30 indicates ‘likely severe mental disorder’ 2. The K-10 has moderate reliability (kappa scores 0.42-0.74).

Suicidality:

SIDAS – The Suicide Ideation Attributes Scale (SIDAS) is a five-item scale assessing suicidal ideation over the past month. The scale assesses frequency, controllability, closeness to attempt, distress and interference with daily activities on a 10-point Likert scale (ranging from 0 (“never”) to 10 (“always”)). A total score of zero corresponds to “no current ideation”, a score of one to 20 corresponds to “low current suicidal ideation”, and a score of 21 to 50 corresponds to “high current suicidal ideation”. The scale has strong internal reliability (Cronbach α = 0.91) 3.

The Brief Non-Suicidal Self-Injury Assessment Tool (B-NSSI-AT) is used to assess for a history of self-harm behaviour, and if needed, the recency and future intention to engage in these behaviours. It comprises three questions from the NSSI-AT 4. The first question determines if the person has previously done anything with the intention of hurting themselves, followed by a question to ask how recent this was, and how likely they are to repeat this behaviour.

Psychosis-like experiences:

PQ-16 – The Prodromal Questionnaire (PQ-16) is a self-report measure used to screen for individuals at risk of psychosis and select individuals for interview of psychosis risk 5. It was adapted from the 92-item Prodromal Questionnaire, including nine items from the perceptual abnormalities subscale, five items from the unusual thought content/delusional ideas subscale, and two items from the negative symptoms subscale 6. Questions require “True” or “False” answers to statements describing feelings, experiences, or symptoms of psychosis. In the event of a “True” response, the participant is required to then interpret the perceived distress of that on a Likert scale (0-3, with 3 being severe distress). A cut-off score of 6 or more on the symptom-scale has been shown to detect at-risk mental states with 87% specificity and sensitivity 5.

Mania-like experiences

ASRM - The Altman Self-Rating Mania Scale (ASRM) is a 5-item scale used to assess the presence and/or severity of manic-like symptoms during the past 7 days. Each item is scored on a 5-point scale (0-4), with total scores ranging from 0-20 and higher scores indicating greater severity. A score greater than 5 indicates a high likelihood of a manic or hypomanic condition, as per 86% sensitivity and 87% sensitivity 7.

Functioning

Youth not in education or employment (NEET) - Engagement with either employment, education, or training was based on questions from the Organisation of Economic Co-operation and Development (OECD), and Census of Population and Housing, Australian Bureau of Statistics (ABS) 8. These four multiple choice questions were: 1) Are you currently engaged in education or study (e.g. school, TAFE or university) on a regular basis?; 2) Are you currently engaged in paid employment or work on a regular basis?; 3) Are you currently engaged in voluntary work through an organisation or group on a regular basis?; and 4) Are you currently providing unpaid care, help or assistance to family members or others because of a disability, a long term illness or problems related to old age on a regular basis? Individuals not involved in employment, education, or training were classified as NEET.

WSAS - The Work and Social Adjustment Scale (WSAS) is a brief and reliable measure of work and social adjustment. The questions aim to assess whether an individual is currently impaired or unable to perform day-to-day tasks, due to their mental health. The scale consists of five items that require the individual to rate between 0-8 (“not at all” to “very severely”), based on their agreement with the statement. A maximum total score is achieved by summing all 5 items. A total score greater than 20 suggests moderately severe psychopathology, 10-20 suggests significant functional impairment with less severe symptomatology, and scores under 10 are associated with subclinical populations. The scale has a test-retest correlation of 0.73 and has correlations of 0.76 for severity of depression and 0.61 for obsessive-compulsive disorder symptoms 9.

Alcohol, Tobacco, Cannabis

ASSIST - The Alcohol, Smoking and Substance Involvement Screening Test (ASSIST) is an 8-item questionnaire that aims to detect substance use-related problems. It screens for use of tobacco, alcohol, cannabis, cocaine, amphetamine-type stimulants, sedatives and sleeping pills, hallucinogens, inhalants, opioids, and other drugs. Besides the first question which concerns life-time experiences, each question requires the individual to respond to questions that concern the prior 3-months on either 5- or 3- point Likert scales 10.

AUDIT-C - The Alcohol Use Disorders Identification Test (AUDIT-C) is a brief measure consisting of three questions related to the frequency of general and binge alcohol consumption over the past year 11. Each question has 5 options that increase in frequency or quantity of consumption (scores range from 0-4) 12. A total score of 0-3 indicates low-risk drinking, 4-5 moderate risk, and scores greater than five indicates high risk drinking, however, this may not apply if total points come from q1 (i.e., when q2 and q3 =0).

Social connection

SSSS - The Schuster’s Social Support Scale (SSSS) is a 6-item questionnaire that aims to assess the frequency of both supportive and negative interactions with family and friends 13. The first five questions are scored on a 4-point Likert scale (0-3; “never” to “often”) with alpha reliability ranging from 0.56-0.75, and the sixth question requires a Yes/No response 13.

Depression

QIDS-SR - The Quick Inventory of Depressive Symptomatology – Self-report (QIDS-SR) consists of 16-items that aim to assess nine domains of depression during the preceding seven days 14. These domains are related to the DSM-IV diagnosis of a major depressive disorder, including: sleep, mood, appetite/weight, concentration/decision making, self-view, suicidal ideation, general interest, energy level, and agitation. Each item is scored on a scale between 0-3 points and scoring instructions determine the total score (which ranges from 0-27) 15. Scores greater than 21 indicate very severe depression, 16-20 indicate severe depression, 11-15 indicate moderate depression, 6-10 indicate mild depression, and scores of 5 or lower indicate no depression.

Anxiety

OASIS - The Overall Anxiety Severity and Impairment Scale aims to assess the severity and impairment of anxiety-related symptoms over the past seven days 16. The scale consists of five multiple choice questions with five options that are scored from 0-4, with higher scores indicating greater severity and/or impairment. A cut-off score of 8 has high validity (87%) for identifying anxiety disorders 17.

Sleep-wake cycle

PSQI - The Pittsburgh Sleep Quality Index (PSQI) is a questionnaire that aims to assess sleep quality and disturbances over the past month 18. It consists of nineteen-items that assess seven domains: sleep quality, sleep latency, sleep duration, habitual sleep efficiency, sleep disturbances, use of sleeping medication, and daytime dysfunction. Each of the seven component scores are summed together to form a global score 18.

MCTQ – The Munich Chronotype Questionnaire (MCTQ) is a self-report scale that assesses bed- and rise-times, and self-assessment of individual chronotype 19. The chronotype options range from extremely early to extremely late and is determined by using the midpoint between onset and offset of sleep.

For our study, a sleep disturbance was flagged if any of the 4 criteria applied to the individual:

1. Delayed sleep (Q1-4)

• Bedtime later than or equal to 12am; AND

• Wake time later than or equal to 9am

2. Short-sleep duration (Q5)

• Hours slept per night <= 7

3. Long-sleep duration (Q5)

• Hours slept per night >= 11

4. Non-restorative sleep (Q5, Q6)

• Reports ‘often’ felt unrested/unrefreshed in the past week AND sleep duration is greater than or equal to 8 hours

Eating behaviours and body image

EDE – The Eating Disorder Examination Questionnaire (EDE-Q) is based on the eating disorder examination interview and aims to assess eating behaviours and body image disturbance over the past four weeks 20. The questionnaire uses a combination of Likert scales and Yes/No options.

For our study, the following scoring threshold was used to determine if the young person had a probable concern: Q1-Q3 = YES AND Q4>=4

REFERENCES

1. Kessler RC, Andrews G, Colpe LJ, Hiripi E, Mroczek DK, Normand SL, et al. Short screening scales to monitor population prevalences and trends in non-specific psychological distress. Psychol Med. 2002;32(6):959-76.

2. Andrews G, Slade T. Interpreting scores on the Kessler Psychological Distress Scale (K10). Aust N Z J Public Health. 2001;25(6):494-7.

3. van Spijker BA, Batterham PJ, Calear AL, Farrer L, Christensen H, Reynolds J, et al. The suicidal ideation attributes scale (SIDAS): Community-based validation study of a new scale for the measurement of suicidal ideation. Suicide Life Threat Behav. 2014;44(4):408-19.

4. Whitlock J, Exner-Cortens D, Purington A. Assessment of nonsuicidal self-injury: development and initial validation of the Non-Suicidal Self-Injury-Assessment Tool (NSSI-AT). Psychol Assess. 2014;26(3):935-46.

5. Ising HK, Veling W, Loewy RL, Rietveld MW, Rietdijk J, Dragt S, et al. The validity of the 16-item version of the Prodromal Questionnaire (PQ-16) to screen for ultra high risk of developing psychosis in the general help-seeking population. Schizophr Bull. 2012;38(6):1288-96.

6. Howie C, Hanna D, Shannon C, Davidson G, Mulholland C. The Structure of the Prodromal Questionnaire-16 (PQ-16): Exploratory and confirmatory factor analyses in a general non-help-seeking population sample. Early Interv Psychiatry. 2021.

7. Altman EG, Hedeker D, Peterson JL, Davis JM. The Altman Self-Rating Mania Scale. Biol Psychiatry. 1997;42(10):948-55.

8. Youth not in employment, education or training (NEET) [Internet]. 2017. Available from: https://www.oecd-ilibrary.org/content/data/72d1033a-en.

9. Mundt JC, Marks IM, Shear MK, Greist JH. The Work and Social Adjustment Scale: a simple measure of impairment in functioning. The British journal of psychiatry : the journal of mental science. 2002;180:461-4.

10. Humeniuk R, Ali R, Babor TF, Farrell M, Formigoni ML, Jittiwutikarn J, et al. Validation of the Alcohol, Smoking And Substance Involvement Screening Test (ASSIST). Addiction. 2008;103(6):1039-47.

11. World Health Organisation. AUDIT: The Alcohol Use Disorders Identification Test: Guidelines for Use in Primary Care. 2 ed. Geneva2001.

12. Bush K, Kivlahan DR, McDonell MB, Fihn SD, Bradley KA. The AUDIT alcohol consumption questions (AUDIT-C): an effective brief screening test for problem drinking. Ambulatory Care Quality Improvement Project (ACQUIP). Alcohol Use Disorders Identification Test. Arch Intern Med. 1998;158(16):1789-95.

13. Schuster TL, Kessler RC, Aseltine RH, Jr. Supportive interactions, negative interactions, and depressed mood. Am J Community Psychol. 1990;18(3):423-38.

14. Rush AJ, Trivedi MH, Ibrahim HM, Carmody TJ, Arnow B, Klein DN, et al. The 16-Item Quick Inventory of Depressive Symptomatology (QIDS), clinician rating (QIDS-C), and self-report (QIDS-SR): a psychometric evaluation in patients with chronic major depression. Biol Psychiatry. 2003;54(5):573-83.

15. Brown ES, Murray M, Carmody TJ, Kennard BD, Hughes CW, Khan DA, et al. The Quick Inventory of Depressive Symptomatology-Self-report: a psychometric evaluation in patients with asthma and major depressive disorder. Ann Allergy Asthma Immunol. 2008;100(5):433-8.

16. Norman SB, Cissell SH, Means-Christensen AJ, Stein MB. Development and validation of an Overall Anxiety Severity And Impairment Scale (OASIS). Depress Anxiety. 2006;23(4):245-9.

17. Campbell-Sills L, Norman SB, Craske MG, Sullivan G, Lang AJ, Chavira DA, et al. Validation of a brief measure of anxiety-related severity and impairment: the Overall Anxiety Severity and Impairment Scale (OASIS). J Affect Disord. 2009;112(1-3):92-101.

18. Buysse DJ, Reynolds CF, 3rd, Monk TH, Berman SR, Kupfer DJ. The Pittsburgh Sleep Quality Index: a new instrument for psychiatric practice and research. Psychiatry Res. 1989;28(2):193-213.

19. Roenneberg T, Wirz-Justice A, Merrow M. Life between clocks: daily temporal patterns of human chronotypes. J Biol Rhythms. 2003;18(1):80-90.

20. Hay PJ, Mond J, Buttner P, Darby A. Eating disorder behaviors are increasing: findings from two sequential community surveys in South Australia. PLoS One. 2008;3(2):e1541.
